# Supplementary material for: Sustained improvements in brain health and metabolic markers 24 months following bariatric surgery
Source: bioRxiv or medRxiv preprint supplement (doi:10.1101/2023.03.08.23286944), 2023-03-08
Supplement: Supplementary file [file media-1.pdf]

## Supplemental material

Table S1: Characteristics of the group of participants who had two pre-surgery sessions

|                                 | Baseline 1   | Baseline 2    | <i>p</i> value     |
|---------------------------------|--------------|---------------|--------------------|
| <i>N</i>                        | 19           | 19            |                    |
| Sexe (F:M)                      | 13 : 6       | 13 : 6        |                    |
| Age (years)                     | 43.8 ± 10.2  | 43.9 ± 9.0    | 0.9884 ; t=2.02619 |
| Diabetic (Y:N)                  | 6 : 13       | 6 : 13        |                    |
| BMI (kg/m <sup>2</sup> )        | 41.7 ± 3.8   | 42.0 ± 3.6    | 0.9703; t=2.02809  |
| Waist circumference (cm)        | 126.2 ± 10.5 | 127.1 ± 11.0  | 0.8000 ; t=2.02619 |
| Neck circumference (cm)         | 41.7 ± 3.8   | 41.8 ± 4.3    | 0.9286 ; t=2.02619 |
| EWL (%)                         | -            | -0.008 ± 0.04 | 0.3037; t=2.02809  |
| TWL (%)                         | -            | -0.001 ± 0.02 | 0.4885 ; t=2.02619 |
| Systolic blood pressure (mmHg)  | 128.0 ± 12.7 | 123.5 ± 12.6  | 0.2844 ; t=2.03011 |
| Diastolic blood pressure (mmHg) | 76.2 ± 11.9  | 74.0 ± 10.2   | 0.5551 ; t=2.03011 |

Results are presented as mean ± SD. **F**, female; **M**, male; **Y**, yes; **N**, no; **BMI**, body mass index; **SG**, sleeve gastrectomy; **RYGB**, Roux-en-Y gastric by-pass; **BPD-DS**, biliopancreatic derivation with duodenal switch; **EWL**, excess weight loss; **TWL**, total weight loss.
